# Supplementary material for: Targeting peroxiredoxin 2 prevents hepatocarcinogenesis in metabolic liver disease models
Source: JCI journal article supplement (doi:10.1172/jci169395), 2025-09-11
Supplement: sd1 [file 1]

1 de Physiologie et explorations fonctionnelles, University Hospital of Strasbourg, Strasbourg,  
2 France ;<sup>13</sup>Faculty of Medicine, University of Strasbourg, Strasbourg, France; <sup>14</sup>University of  
3 Vermont Cancer Center, Larner College of Medicine, Department of Pathology and Laboratory  
4 Medicine, Burlington, VT USA; <sup>15</sup>Gastroenterology and Hepatology Service, Strasbourg  
5 University Hospitals, Strasbourg, France; <sup>16</sup>Institut Universitaire de France (IUF), Paris,  
6 France.

7

8 \* These authors contributed equally

9 **\$ corresponding authors**

10

## 11 **Table of contents**

|    |                                                                                                                      |    |
|----|----------------------------------------------------------------------------------------------------------------------|----|
| 12 | SUPPLEMENTARY MATERIAL AND METHODS:.....                                                                             | 4  |
| 13 | SUPPLEMENTARY FIGURES:.....                                                                                          | 13 |
| 14 | Supplementary Figure 1 (related to Figure 1C-E): Single cell RNA-Seq analysis of normal and cirrhotic                |    |
| 15 | patient livers.....                                                                                                  | 14 |
| 16 | Supplementary Figure 2 (related to Figure 1F): PRDX2 expression in HCC patient tissues.....                          | 15 |
| 17 | Supplementary Figure 3 (related to Figure 1): PRDX2 is overexpressed in HCC derived cell lines (Huh7)                |    |
| 18 | compared to primary human hepatocytes (PHH).....                                                                     | 16 |
| 19 | Supplementary Figure 4 (related to Figure 1): Co-regulatory cirrhosis gene module associated with elevated           |    |
| 20 | HCC risk in cirrhotic patients.....                                                                                  | 17 |
| 21 | Supplementary Figure 5 (related to Figure 2A). Selection of single guide RNA (sgRNA) targeting mouse                 |    |
| 22 | <i>Prdx2</i> in Hepa 1-6 Cas9 cells.....                                                                             | 18 |
| 23 | Supplementary Figure 6 (related to Figure 2). <i>PRDX2</i> knock-down (KD) in primary human hepatocytes              |    |
| 24 | (PHH) showed no cytotoxic effect.....                                                                                | 19 |
| 25 | Supplementary Figure 7 (related to Figure 2B). <i>Prdx2</i> KO does not significantly affect expression of the other |    |
| 26 | <i>Prdx</i> family members in mouse livers.....                                                                      | 20 |
| 27 | Supplementary Figure 8 (related to Figure 3B): <i>Prdx2</i> KO decreases CD44 expression in a MASH/HCC               |    |
| 28 | mouse model.....                                                                                                     | 21 |
| 29 | Supplementary Figure 9 (related to Figure 3C): <i>Prdx2</i> KO decreases pro-inflammatory cytokine secretion in a    |    |
| 30 | MASH/HCC mouse model.....                                                                                            | 22 |

|    |                                                                                                                 |    |
|----|-----------------------------------------------------------------------------------------------------------------|----|
| 1  | Supplementary Figure 10 (related to Figure 3D). Effect of <i>Prdx2</i> KO on p53 expression. ....               | 23 |
| 2  | Supplementary Figure 11 (related to Figure 3): PRDX2 expression and conformation in mouse livers. ....          | 24 |
| 3  | Supplementary Figure 12 (related to Figure 3): PRDX2 expression and conformation in human livers. ....          | 25 |
| 4  | Supplementary Figure 13 (related to Figure 4C). Inhibition of PRDX2 decreases STAT3 activation in PHH           | 26 |
| 5  | Supplementary Figure 14 (related to Figure 5A): Validation of GalNac siRNA targeting <i>Prdx2</i> efficacy..... | 27 |
| 6  | Supplementary Figure 15 (related to Figure 5B-C): AMPK expression, activation and lipid accumulation in         |    |
| 7  | mouse livers treated with GalNac siRNAs. ....                                                                   | 28 |
| 8  | Supplementary Figure 16 (related to Figure 6E): <i>PRDX2</i> KO decreases CD44 expression in a CDX mouse        |    |
| 9  | model.....                                                                                                      | 29 |
| 10 | Supplementary Figure 17 (related to Figure 8A-B): Role of PRDX2 in cancer development and progression.          | 30 |
| 11 | Supplementary Figure 18 (related to Figures 8E-F): Expression of the main antioxidant defense systems in        |    |
| 12 | mouse livers and in <i>PRDX2</i> KO cancer cells. ....                                                          | 31 |
| 13 | <b>SUPPLEMENTARY TABLES:</b> .....                                                                              | 32 |
| 14 | Supplementary Table 1 (related to supplementary Figure 1): Clinical information of the HCC cases. ....          | 32 |
| 15 | Supplementary Table 2 (related to Figure 1H): The 32 gene PLS. ....                                             | 33 |
| 16 | Supplementary Table 3 (related to Figure 3): Gene set enrichment analysis (GSEA) of RNA-Seq from mouse          |    |
| 17 | liver tissues (MASH/HCC mouse model). Refer to the excel table .....                                            | 34 |
| 18 | Supplementary Table 4: Reagents and resources .....                                                             | 34 |
| 19 | <b>SUPPLEMENTARY REREFENCES:</b> .....                                                                          | 38 |
| 20 |                                                                                                                 |    |
| 21 |                                                                                                                 |    |
| 22 |                                                                                                                 |    |
| 23 |                                                                                                                 |    |
| 24 |                                                                                                                 |    |
| 25 |                                                                                                                 |    |
| 26 |                                                                                                                 |    |
| 27 |                                                                                                                 |    |
| 28 |                                                                                                                 |    |
| 29 |                                                                                                                 |    |

## 1 **SUPPLEMENTARY MATERIAL AND METHODS:**

### 2 **Cell lines**

3 Huh7.5.1 cells are a gift from Dr. F. Chisari (The Scripps Research Institute, La Jolla, CA),  
4 Huh7 cells are a gift from Prof. G. Cristofori (University of Basel) and Hepa1.6 were purchased  
5 from ATCC. Huh7.5.1, Huh7 and Hepa1.6 cells were cultured in Dulbecco's Modified Eagle  
6 Medium (DMEM) supplemented with 10% heat-decomplemented fetal bovine serum,  
7 gentamycin (0.05 mg/mL) and non-essential amino acids (except for Hepa1.6 cells) at 37°C  
8 with 5% CO<sub>2</sub>. For proliferation arrest and differentiation (Huh-7.5.1<sup>dif</sup> cells), Huh-7.5.1 cells  
9 were cultured in complete DMEM supplemented with 1% DMSO for 10 days before seeding  
10 (1). The cell lines were certified mycoplasma free.

### 12 **Primary human hepatocytes (PHH)**

13 PHH were obtained from patients undergoing liver resection with informed consent from all  
14 patients for de-identified use at the Institute for Translational Medicine and Liver Disease  
15 (ITM), Strasbourg, France (DC-2016-2616 and RIPH2 LivMod IDRCB 2019-A00738-49,  
16 ClinicalTrial NCT04690972). PHH were isolated as described (1). Briefly, liver specimens  
17 were perfused for 15 minutes with calcium-free 4-(2-hydroxyethyl)-1-piperazine  
18 ethanesulfonic acid buffer containing 0.5 mM ethylene glycol tetraacetic acid (Fluka) followed  
19 by perfusion with 4-(2-hydroxyethyl)-1-piperazine ethanesulfonic acid containing 0.5 mg/mL  
20 collagenase (Sigma-Aldrich) and 0.075% CaCl<sub>2</sub> at 37°C for 15 min. Then the cells were washed  
21 with phosphate-buffered saline (PBS) and nonviable cells were removed by Percoll® (Sigma-  
22 Aldrich) gradient centrifugation. PHH were then seeded on collagen type I coated plates  
23 (Corning®) in complete William Medium.

24

## 1 ***In vitro* CRISPR/Cas9 gene editing**

2 Lentiviruses expressing single guide RNA (sgRNAs) were generated by transient transfection  
3 of HEK 293T cells. HEK 293T cells were adjusted to a density of  $2 \cdot 10^5$  cells/mL and 10mL  
4 were added to a 10 cm diameter Petri dish. The day after, the cell culture media was replaced.  
5 In parallel, 8.1  $\mu$ g of PS-PAX2 (#12260 Addgene), 2.7  $\mu$ g of pMD2.G (#12259 Addgene), 8.1  
6  $\mu$ g of pXPR-BRD016-PRDX2, 62  $\mu$ L of 2M CaCl<sub>2</sub> (Clontech) are mixed to nuclease free water  
7 to a final volume of 500  $\mu$ L. The mix was dripped on 500  $\mu$ L of HEPES-Buffer Saline  
8 (Clontech) a polypropylene hemolysis tube. This mix was left 20 minutes at room temperature  
9 and homogeneously added on the HEK 293T cells. Two days after transfection, the supernatants  
10 were harvested, filtered through 0.45  $\mu$ m, aliquoted and stocked at -80°C until use. Huh7.5.1  
11 stably expressing Cas-9 endonuclease (Huh7.5.1-Cas9) were generated by transduction of a  
12 lentiviral vector expressing Cas9 (pXPR\_BRD111, Broad Institute). For *PRDX2* KO,  
13 Huh7.5.1-Cas9 cells were then transduced with lentiviruses expressing single guide RNA  
14 (sgRNA) CTRL targeting *GFP* (sgCTRL) or sgRNA targeting *PRDX2* designed by the Broad  
15 Institute. After 48 h, transduced cells were selected under hygromycin treatment (125  $\mu$ g/ml).  
16 *PRDX2* KO was determined by Western blot analysis.

17

## 18 **Production of AAV vectors for *in vivo* gene editing**

19 Recombinant adeno-associated virus serotype 8 (AAV8-sgCtrl and AAV8-sgPrdx2) were  
20 produced by *PEI-mediated transient transfection of a HEK293T-derived cell line (293T/17)*  
21 with pAAV-sgCTRL or pAAV-sgPrdx2 expression plasmids and the pDP8.ape helper plasmid  
22 for serotype 8 (N°478, Plasmidfactory). Two days after transfection, AAV vectors were purified  
23 from cell lysate by Iodixanol gradient ultracentrifugation. Cells were harvested in 24 mL lysis  
24 buffer per *HYPERFlask cell culture vessel (Corning)*. The lysate was subjected two freeze-thaw  
25 cycles in dry ice/ethanol and 37 °C water baths, further treated with 100 U/mL Benzonase

1 (Merck) for 1 hour at 37 °C and clarified by centrifugation at 3,000 x g for 15 min. AAV vectors  
2 were purified by Iodixanol gradient ultracentrifugation as described in OptiPrep™ Application  
3 Sheet V14 (Axis Shield). Viruses were dialyzed and concentrated against AAV formulation  
4 buffer (Dulbecco's PBS with 0.5 mM MgCl<sub>2</sub>) using centrifugal filters (Amicon Ultra-15, 100  
5 KDa cutoff) and finally filtered through 0.22 µm. Viral titers were determined by qPCR using  
6 LightCycler480 SYBR Green I Master (Roche) with primers 5'-  
7 GACGACGGCAACTACAAGA-3' and 5'-GTGGCTGATGTAGTTGTACTC-3'). The  
8 standard curve was performed with 10-fold serial dilutions of pAAV that was freshly  
9 denatured in 200mM NaOH for 45 min at 65°C and neutralized by addition of an equimolar  
10 amount of HCl. AAV8 viruses were diluted to a final concentration of 1x 10<sup>13</sup> viral genome per  
11 ml (vg/ml) and stored at -80°C until use.

12

### 13 **HCV infection**

14 Cell culture-derived HCVcc Jc1(2) were produced in Huh7.5.1 cells by electroporation of viral  
15 RNA. The cell culture supernatants were harvested every 3 days for a total of 12 days and were  
16 concentrated 10 times using Vivaspin 20, 10,000 MWCO PES (Sartorius). In parallel, Huh7.5.1  
17 were subjected to the electroporation protocol without viral RNA and the supernatants were  
18 collected and concentrated in the same conditions (mock-electroporated cells). HCV infectivity  
19 was determined by calculating the Tissue culture Infective Dose 50 (TCID<sub>50</sub>). To analyze the  
20 PLS induction, Huh7.5.1<sup>dif</sup> cells were infected with HCV Jc1 (TCID 10<sup>6</sup> infectious particle  
21 /mL), for a total of 10 days (1). Cell culture supernatants from mock-electroporated cells  
22 (without viral RNA) were used for control experiments. PLS induction in virus-infected cells  
23 was always determined using mock-infected cells as control references.

24

## 1 **PLS calculation**

2 The PLS 32 gene expression profiling was performed using 250-500 ng total RNA by using  
3 nCounter Digital Analyzer system (NanoString). For the PLS 32 gene list, refer to  
4 **Supplementary Table 3**. PLS gene expression was normalized according to 6 housekeeping  
5 gene expression using GenePattern genomic analysis toolkits (3, 4). Detailed PLS gene  
6 expression profiles are presented as heatmaps showing the mean expression of the 32 PLS genes  
7 using Morpheus software (z scores of log<sub>2</sub> normalized data). Induction or suppression of the  
8 PLS signature was determined as previously reported by using Gene Set Enrichment Analysis  
9 (GSEA), implemented in GenePattern genomic analysis toolkits (3, 4). PLS was always  
10 determined by using CTRL cells as references. Results are presented as simplified heatmaps  
11 showing the classification of PLS global status as poor or good prognosis and the significance  
12 of induction/suppression of PLS genes (log<sub>10</sub> of false discovery rate (FDR) values). Global  
13 status corresponds to the difference between low risk- and high risk-gene expression. PLS  
14 induction in virus-infected cells was always determined using mock-infected cells as control  
15 references.

16

## 17 **RNA sequencing analysis and data processing**

18 Total liver RNA (500 ng) from 3 CDA-HFD *sgCtrl* and 3 CDA-HFD *sgPrdx2* mice liver were  
19 submitted to Next Generation Sequencing (Biomedical Sequencing Facility, CEMM Research  
20 Center for Molecular Medicine of the Austrian Academy of Sciences, Vienna (Austria)). Data  
21 were analyzed as previously described in (5).

22

## 23 **Gene expression analysis**

24 Total RNA from mouse livers were obtained using Tri Reagent (MRC) and Direct-zol RNA  
25 Miniprep kit (Zymo Research). Total RNA from cells in culture were obtained using the

1 ReliaPrep™ RNA Miniprep Systems kit (Promega). RNA quantity and quality was assessed  
2 using Nanodrop. Total liver RNA (500 ng) was used for cDNA synthesis using Maxima H  
3 Minus Reverse Transcriptase (ThermoFisher), cDNA was then used for quantitative real-time  
4 qPCR with iTaq Universal SYBR Green Supermix (Biorad) or iTaq Universal Probes Supermix  
5 (Biorad). Relative gene expression was calculated using the  $2^{-\Delta CT}$  method, using *GAPDH* or  
6 *18S* as reference genes. The references for the primers are indicated in **Supplementary Table**  
7 **5**.

8

### 9 **Wound healing assay**

10 Huh7 cells were reversed transfected with siRNA targeting *PRDX2* expression or non-targeting  
11 *CTRL* using Lipofectamine RNAi max (Invitrogen) according to manufacturer's instructions.  
12 After 2 days, the cells were treated with mitomycin C 5  $\mu$ g/mL (Sigma) to block cell  
13 proliferation. Wound healing assay was performed using Wound Healing Assay kit (Abcam)  
14 following manufacturer's instructions. Pictures were taken at 0 hour and 24 hours post-  
15 scratching with a camera-equipped microscope (Motic AE2000). Distance between wound  
16 edges was measured with Image J.

17

### 18 **Invasion assay**

19 Huh7 cells were reversed transfected with siRNA targeting *PRDX2* expression or non-targeting  
20 *CTRL* using Lipofectamine RNAi max (Invitrogen) according to manufacturer's instructions.  
21 For invasion, 100  $\mu$ L of Culturex Basement Membrane Extract at 3,33 mg/mL in serum free  
22 media was added to the upper chamber of transwell (Corning Costar Transwell cell culture  
23 inserts) and incubated at 37°C for 30 minutes. After the gel was formed, cells were detached  
24 and resuspended in serum free medium and 100 000 cells were transferred to transwell inserts  
25 (24 well plate format). Then 600  $\mu$ L of complete medium was added to the lower chamber.

1 After 24h of incubation at 37°C, the residual cells on the surface and the gel were removed.  
2 Then cells, were fixed in 70% ethanol and stained with 0,2% crystal violet. The invading cells  
3 were photographed with a camera-equipped microscope (Motic AE2000) and Colored Area  
4 was evaluated in five different fields using ImageJ.

5

## 6 **Lipid staining**

7 PHH were incubated with free fatty acids (FFA): 800 µM oleic acid and 400 µM palmitic acid  
8 for 48 h. Intracellular neutral lipids were stained with HCS LipidTOX™ Deep Red Neutral  
9 Lipid Stain (ThermoFisher) according to manufacturer's instructions. Nuclei were  
10 counterstained with DAPI. Fluorescent imaging was performed using an Axio Observer Z1  
11 microscope and ZEN software (Carl Zeiss, Germany).

12

## 13 **Mitochondrial respiration**

14 Mitochondrial respiration was assessed in a two-chamber respirometer Oroboros Oxygraph-2k  
15 (O2k; Oroboros Instruments, Innsbruck, Austria) at 37 °C, and data were acquired and analyzed  
16 using DataLab software (Oroboros Instruments, Innsbruck, Austria). Huh7 cells were reversed  
17 transfected with siRNA targeting *PRDX2* expression or non-targeting CTRL using  
18 Lipofectamine RNAi max (Invitrogen) according to manufacturer's instructions. After 3 days,  
19 cells were harvested, centrifuged at 2000 RPM for 5 min (20 °C) and re-suspended in 100 µL  
20 of the 2,1 mL MirO5 buffer placed in the chamber (0.5 mM EGTA, 3 mM MgCl<sub>2</sub>, 60mM  
21 Potassium lactobionate, 20 mM Taurine, 10 mM KH<sub>2</sub>PO<sub>4</sub>, 20mM HEPES, 110 mM Sucrose  
22 and 2mg/ml BSA) and containing 0,125 mg/mL saponin for cell permeabilization. The final  
23 cells concentration in the O2k-chamber was 10<sup>6</sup> cell/mL. The adapted SUIT-011 Oroboros  
24 protocol was used for the respiration measurement. Malate (2 mM) and glutamate (10 mM)  
25 were added and Complex I-linked substrate state was measured. Then, ADP (2mM) were added

1 to measure Complex-I OXPHOS, Succinate (10mM) to measure Complex I & II OXPHOS,  
2 and finally Rotenone (0.5  $\mu$ M) to measure Complex II OXPHOS.

3

#### 4 **Native gels**

5 After TS treatment, cells were incubated in warm PBS supplemented with 100 mM S-Methyl  
6 Methanethiosulfonate (MMTS, Sigma) for 20 min at 37°C and lysed in RIPA buffer + protease  
7 inhibitor (150 mM NaCl, 1% NP-40, 0.25% Na-deoxycholate, 50 mM Tris-HCl pH7.4, 1 mM  
8 EDTA, qsp H<sub>2</sub>O) supplemented with 100 mM MMTS. Tissues were lysed in RIPA buffer +  
9 protease inhibitor + 100 mM MMTS. PRDX2 conformation was assessed by SDS-PAGE  
10 electrophoresis in native conditions (without denaturing buffer).

11

#### 12 **Stain free and Western blot quantification**

13 To measure total protein levels in Western blot analysis, we used the Stain Free Imaging  
14 Technology (Biorad) according to manufacturer's instructions. Data integration was performed  
15 using Image Lab software (Biorad). All the quantifications of the protein intensity were  
16 normalized to total proteins.

17

#### 18 **Proliferation and cell cycle assay**

19 Huh7 cells were reverse-transfected with siRNA targeting *PRDX2* expression or non-targeting  
20 *CTRL* using Lipofectamine RNAi max (Invitrogen) according to manufacturer's instructions.

21 After 2 days, cells were synchronized by incubating the cell in serum free medium overnight  
22 and then adding complete medium + Edu at 10  $\mu$ M for 4h. Cells were harvested, fixed and co-  
23 stained with Click-iT® Edu Flow Cytometry FITC kit (ThermoFisher) for cell proliferation and  
24 FxCycle™ Far Red Stain (ThermoFisher) for DNA content and cell cycle according to the  
25 manufacturer instructions. Flow cytometry was performed using the CytoFLEX cytometer

1 (Beckman Coulter) and analyses were performed with FlowJo Data analysis software (BD  
2 Biosciences).

3

#### 4 **Apoptosis assay**

5 Huh-7.5.1-Cas9 cells *CTRL* or KO for *PRDX2* were treated with 300  $\mu$ M H<sub>2</sub>O<sub>2</sub> for 6h. Caspase-  
6 3/7 activation was detected by immunoblotting or using CellEvent® Caspase-3/7 Green  
7 Detection Reagent (ThermoFisher) following manufacturer's instructions and using Celigo  
8 Image Cytometer (Nexcelcom Biosciences).

9

#### 10 **Histology, immunohistochemistry, plasma biochemistry**

11 Macroscopic tumor nodules were counted from livers and their size was determined on liver  
12 pictures using ImageJ. For the MASH/HCC mice, formalin-fixed samples were embedded in  
13 paraffin, cut in 2  $\mu$ m sections and used for IHC. For hematoxylin and eosin (H&E) or Picrosirius  
14 Red, 5  $\mu$ m sections were performed. For patient samples and GalNac mouse model, formalin-  
15 fixed samples were embedded in paraffin, cut in 5  $\mu$ m sections for H&E, IHC and Picrosirius  
16 Red. For TUNEL staining, sections were stained with the TUNEL Assay Kit – HRP DAB  
17 (Abcam #206386) following the manufacturer instructions. OCT- mounted samples were cut in  
18 10  $\mu$ m sections and stained with Oil Red O. Glass slide-mounted tissues were scanned with  
19 Nanozoomer scanner (Hamamatsu), images were analyzed using image processing software  
20 (NDP.view.2) and quantification using Image J (Sirius red) or Qu-Path (IHC).

21

#### 22 **Hydroxyproline quantification**

23 Hydroxyproline was quantified in frozen liver tissues from the diet-based MASH/HCC mouse  
24 model, using the Hydroxyproline Assay Kit (Sigma) following manufacturer's instructions.  
25 Briefly, between 12 to 21 mg of frozen liver tissues were sampled from each mouse (Chow diet

1 n = 6, DEN/CDA-HFD *sgCtrl* n =18, DEN/CDA-HFD *sgPrdx2* n =16), homogenized in 100  
2  $\mu$ L of water and hydrolyzed with 100  $\mu$ L HCl (12M) at 120°C for 3 hours. Then 25 $\mu$ L of each  
3 sample were used in duplicates for hydroxyproline quantification.

4

#### 5 **Sequence of PRDX2 C51S and WT resistant to *sgPRDX2***

6 The yellow sequence corresponds to *sgPRDX2* target sequence, and the bold letters correspond  
7 to the silent mutation for guide resistance. TGC codon (cysteine) was mutated in AGC (serine)  
8 in the C51S sequence (indicated by a star).

#### 9 **WT resistant to *sgPRDX2*:**

10 /5PHOS/AAAAACTAGTGCCGCCATGGCCTCCGGTAACGCGCGCATCGGAAAGCCAGCCCC  
11 TGACTTCAAGGCCACAGCGGTGGTTGATGGCGCCTTCAAAGAGGTAAAACACTATCAGATTA  
12 TAAAGGGAAGTACGTGGTCCTCTTTTTCTACCCTCTGGACTTCACTTTTGTGTGC\*CCCAC  
13 CGAGATCATCGCGTTCAGCAACCGTGCAGAGGACTTCCGCAAGCTGGGCTGTGAAGTGCT  
14 GGGCGTCTCGGTGGACTCTCAGTTCACCCACCTGGCTTGGATCAACACCCCCCGAAAGA  
15 GGGAGGCTTGGGCCCCCTGAACATCCCCCTGCTTGCTGACGTGACCAGACGCTTGTCTGA  
16 GGATTACGGCGTGCTGAAAACAGATGAGGGCATTGCCTACAGGGGCCTCTTTATCATCGA  
17 TGGCAAGGGTGTCTTCGCCAGATCACTGTAAATGATTTGCCTGTGGGACGCTCCGTGGA  
18 TGAGGCTCTGCGGCTGGTCCAGGCCTTCCAGTACACAGACGAGCATGGGGAAGTTTGTCC  
19 CGCTGGCTGGAAGCCTGGCAGTGACACGATTAAGCCCAACGTGGATGACAGCAAGGAAT  
20 ATTTCTCCAAACACAATTAGTAAGTTT

21

#### 22 **C51S resistant to *sgPRDX2*:**

23 /5PHOS/AAAAACTAGTGCCGCCATGGCCTCCGGTAACGCGCGCATCGGAAAGCCAGCCCC  
24 TGACTTCAAGGCCACAGCGGTGGTTGATGGCGCCTTCAAAGAGGTAAAACACTATCAGATTA  
25 TAAAGGGAAGTACGTGGTCCTCTTTTTCTACCCTCTGGACTTCACTTTTGTGAGC\*CCCAC  
26 CGAGATCATCGCGTTCAGCAACCGTGCAGAGGACTTCCGCAAGCTGGGCTGTGAAGTGCT  
27 GGGCGTCTCGGTGGACTCTCAGTTCACCCACCTGGCTTGGATCAACACCCCCCGAAAGA  
28 GGGAGGCTTGGGCCCCCTGAACATCCCCCTGCTTGCTGACGTGACCAGACGCTTGTCTGA  
29 GGATTACGGCGTGCTGAAAACAGATGAGGGCATTGCCTACAGGGGCCTCTTTATCATCGA  
30 TGGCAAGGGTGTCTTCGCCAGATCACTGTAAATGATTTGCCTGTGGGACGCTCCGTGGA  
31 TGAGGCTCTGCGGCTGGTCCAGGCCTTCCAGTACACAGACGAGCATGGGGAAGTTTGTCC  
32 CGCTGGCTGGAAGCCTGGCAGTGACACGATTAAGCCCAACGTGGATGACAGCAAGGAAT  
33 ATTTCTCCAAACACAATTAGTAAGTTT

34

35

36

1 **SUPPLEMENTARY FIGURES:**

2 **Supplementary Figure 1**

3  
4

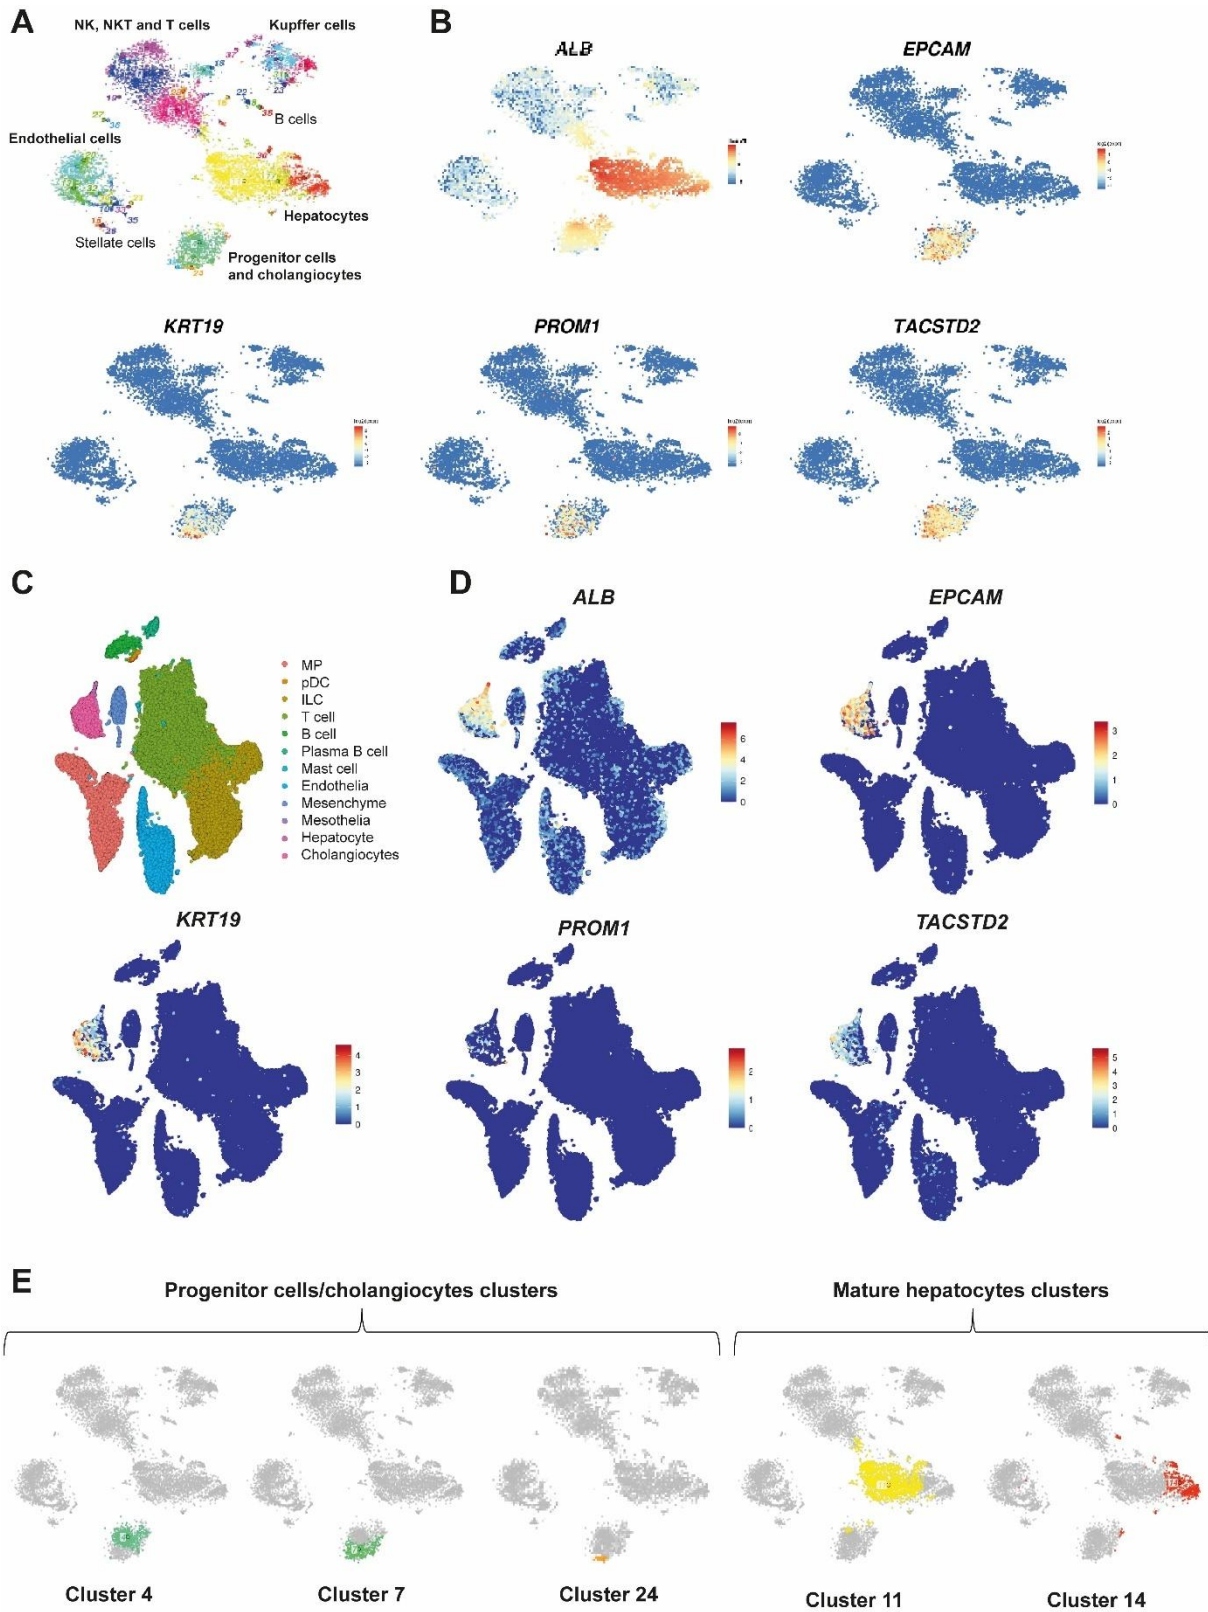

5  
6  
7

1 **Supplementary Figure 1 (related to Figure 1C-E): Single cell RNA-Seq analysis of normal**  
2 **and cirrhotic patient livers. A.** *t*-SNE map of single-cell transcriptomes from normal patient  
3 liver tissues (nine donors) highlighting the main liver cell compartments. Cells sharing similar  
4 transcriptome profiles are grouped by clusters and each dot represents one cell. **B.** Expression  
5 *t*-SNE maps of *ALB* (hepatocytes), *ECPAM*, *KRT19*, *PROM1* and *TACSTD2* (progenitor cells  
6 and cholangiocytes) are shown. The color bar indicates log<sub>2</sub> normalized expression. Data  
7 extracted from (6). **C.** Cell lineages from normal and cirrhotic patient liver tissues (5 non-  
8 diseased and 5 cirrhotic human livers) inferred from expression of marker gene signatures. MP:  
9 mononuclear phagocyte; pDC: plasmacytoid dendritic cell; ILC: innate lymphoid cell. **D.**  
10 Expression *t*-SNE maps of *ALB* (hepatocytes), *ECPAM*, *KRT19*, *PROM1* and *TACSTD2*  
11 (progenitor cells and cholangiocytes) are shown. The color bar indicates log<sub>2</sub> normalized  
12 expression. Data extracted from (7). **E.** *t*-SNE map showing the different cell clusters presented  
13 in Figure 1E corresponding to progenitor cells/cholangiocytes and mature hepatocytes clusters.  
14 Data extracted from (6).

15

16

17

18

19

20

21

22

23

24

25

26

27

28

29

1 **Supplementary Figure 2**

2

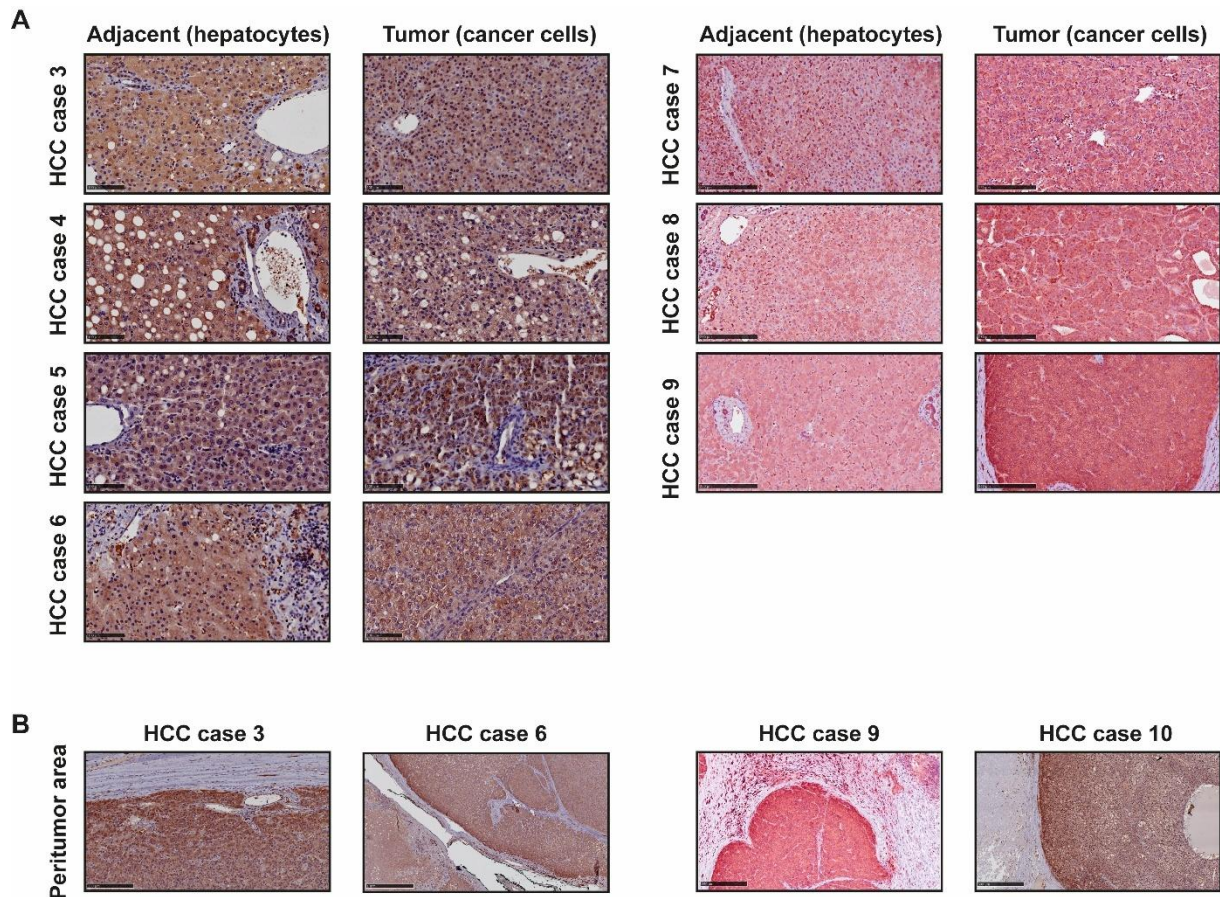

3

4

5

6 **Supplementary Figure 2 (related to Figure 1F): PRDX2 expression in HCC patient tissues.**

7 **A.** Representative pictures of IHC analyses showing PRDX2 protein expression in adjacent non

8 tumoral tissues and tumor tissues from HCC patients. Clinical information are available in

9 **Supplementary Table 1.** Left panels: CRB Strasbourg tissue collection, scale bar 100  $\mu$ m.

10 Right panels: LivMod Strasbourg tissue collection, scale bar 250  $\mu$ m. **B.** Representative images

11 of the peritumor areas showing a gradient in PRDX2 expression (when peritumor area is well

12 defined). The difference in color between the 2 cohorts are due to different scanner settings.

13

14

15

16

17

18

1 **Supplementary Figure 3**

2  
3

**A**

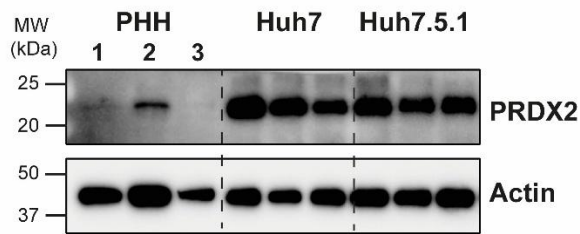

**B**

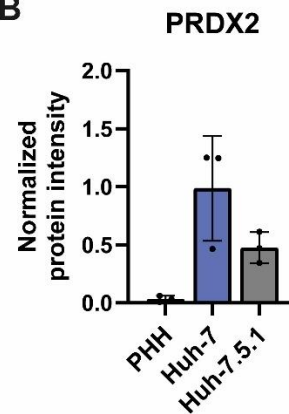

4  
5

6 **Supplementary Figure 3 (related to Figure 1): PRDX2 is overexpressed in HCC derived**  
7 **cell lines (Huh7) compared to primary human hepatocytes (PHH).** A. PRDX2 expression  
8 was assessed in PHH (3 donors), Huh-7 and Huh-7.5.1 cells by Western blot analysis. B. The  
9 graph shows means +/- sd of normalized protein intensity in the different cell types.

10

11

12

13

14

15

16

17

18

19

20

21

22

23



1 **Supplementary Figure 5**

2

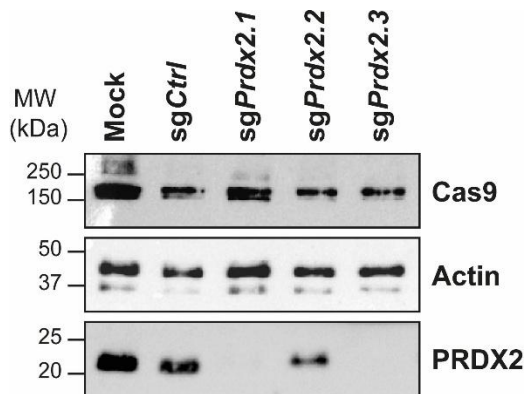

3

4

5 **Supplementary Figure 5 (related to Figure 2A). Selection of single guide RNA (sgRNA)**  
6 **targeting mouse *Prdx2* in Hepa 1-6 Cas9 cells.** *Prdx2* KO was performed in Hepa 1-6 Cas9  
7 cells using Lentivirus coding for *Prdx2*-specific sgRNAs or *sgCtrl* targeting GFP. *Prdx2* KO  
8 was assessed by Western-blot analysis. *sgPrdx2.3* was selected for *in vivo* experiments.

9

10

11

12

13

14

15

16

17

18

19

20

21

22

23

24

25

1 **Supplementary Figure 6**

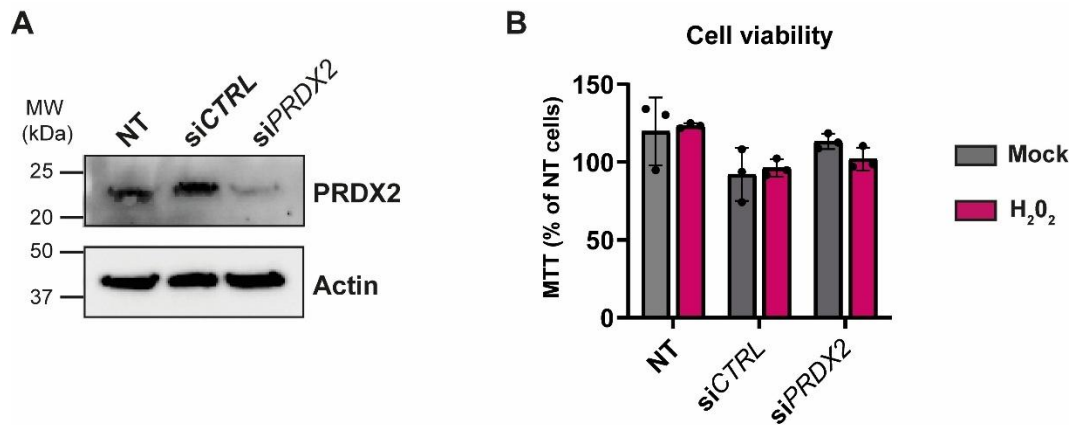

2

3 **Supplementary Figure 6 (related to Figure 2). *PRDX2* knock-down (KD) in primary**  
4 **human hepatocytes (PHH) showed no cytotoxic effect. A.** Western blot analysis showing  
5 *PRDX2* KD in PHH. NT = non-transfected. **B.** MTT assay was performed to measure cell  
6 viability in non-treated (mock) and H<sub>2</sub>O<sub>2</sub> treated PHH to induce oxidative stress (300 μM, 6  
7 hours). The graph shows means +/- sd of cell viability in % to non-transfected cells of one  
8 experiment performed in triplicate.

9

10

11

12

13

14

15

16

17

18

19

20

21

1 **Supplementary Figure 7**

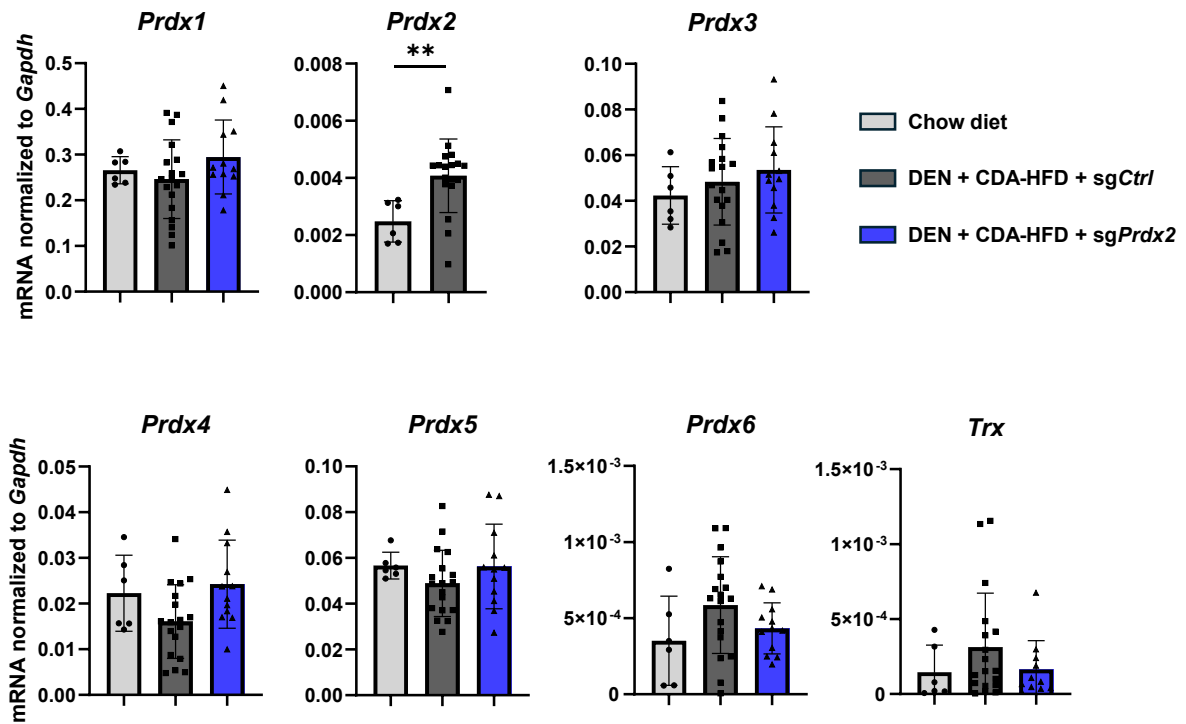

2

3 **Supplementary Figure 7 (related to Figure 2B). *Prdx2* KO does not significantly affect**  
4 **expression of the other *Prdx* family members in mouse livers. *Prdx* 1 to 6 and thioredoxin**  
5 **(*Trx*) expression was measured by qRT-PCRs in mouse livers. The graph shows means +/- sd**  
6 **of *Prdx* mRNAs normalized to *Gapdh* (Chow, n = 6; sgCtrl n = 18; sgPrdx2, n = 16). \*\* p <**  
7 **0.005 (Mann-Whitney test for *Prdx2*; Kruskal-Wallis test for other *Prdx*).**

8

9

10

11

12

13

14

15

16

17



1 **Supplemental Figure 9**

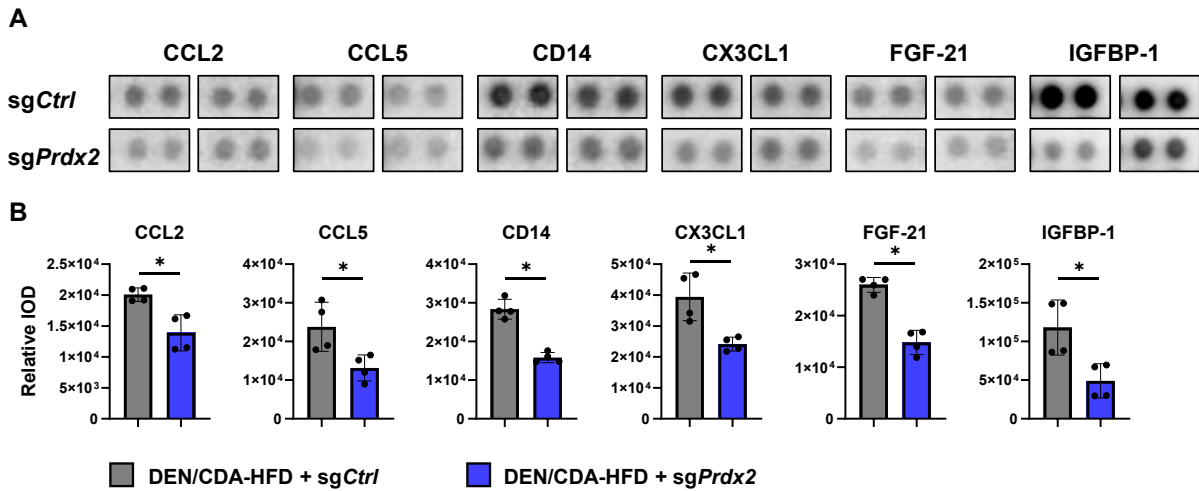

2

3

4 **Supplementary Figure 9 (related to Figure 3C): *Prdx2* KO decreases pro-inflammatory**  
 5 **cytokine secretion in a MASH/HCC mouse model. A.** Cytokine array analysis of mouse sera  
 6 (2 animals per group, in duplicate). The dot plots show expression of secreted cytokines  
 7 significantly decreased by *Prdx2* KO. B. The graphs show means +/- sd of relative integrated  
 8 optical density of the proteins (IOD). \*  $p < 0.05$  (Mann-Whitney test). CCL2 = C-C motif  
 9 chemokine ligand 2; CCL5 = C-C motif chemokine ligand 5; CD14 = monocyte differentiation  
 10 antigen CD14; CX3CL1 = C-X3-C Motif Chemokine Ligand 1; FGF-21 = fibroblast growth  
 11 factor 21; IGFBP-1 = insulin like growth factor binding protein 1.

12

13

14

15

16

17

18

19

20

1 **Supplementary Figure 10**

2

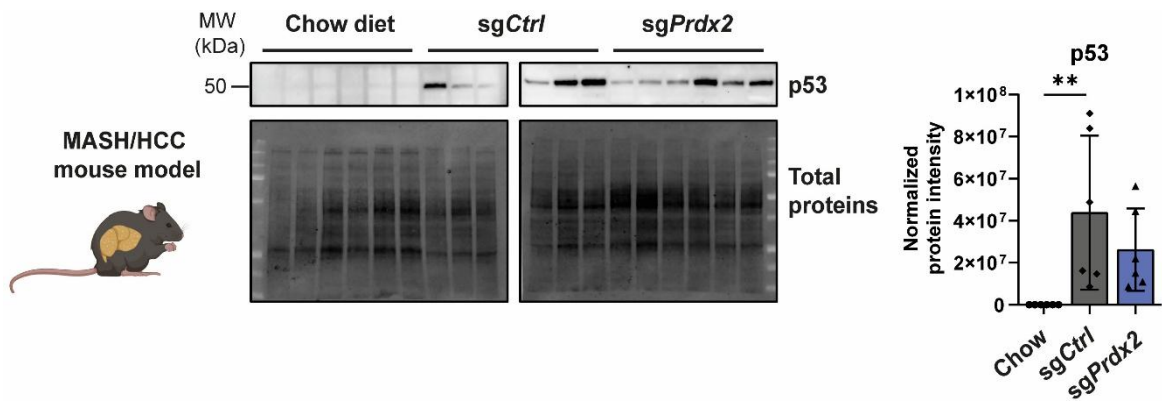

3

4 **Supplementary Figure 10 (related to Figure 3D). Effect of *Prdx2* KO on p53 expression.**

5 P53 expression was assessed by Western blot analysis in mouse livers (MASH/HCC model, 6  
6 animals per group). The graph shows means +/- sd of protein intensity normalized to total  
7 proteins. \*\* p < 0.005 (Kruskal-Wallis test followed by Dunn's multiple comparisons test).

8

9

10

11

12

13

14

15

16

17

18

19

20

21

1 **Supplementary Figure 11**

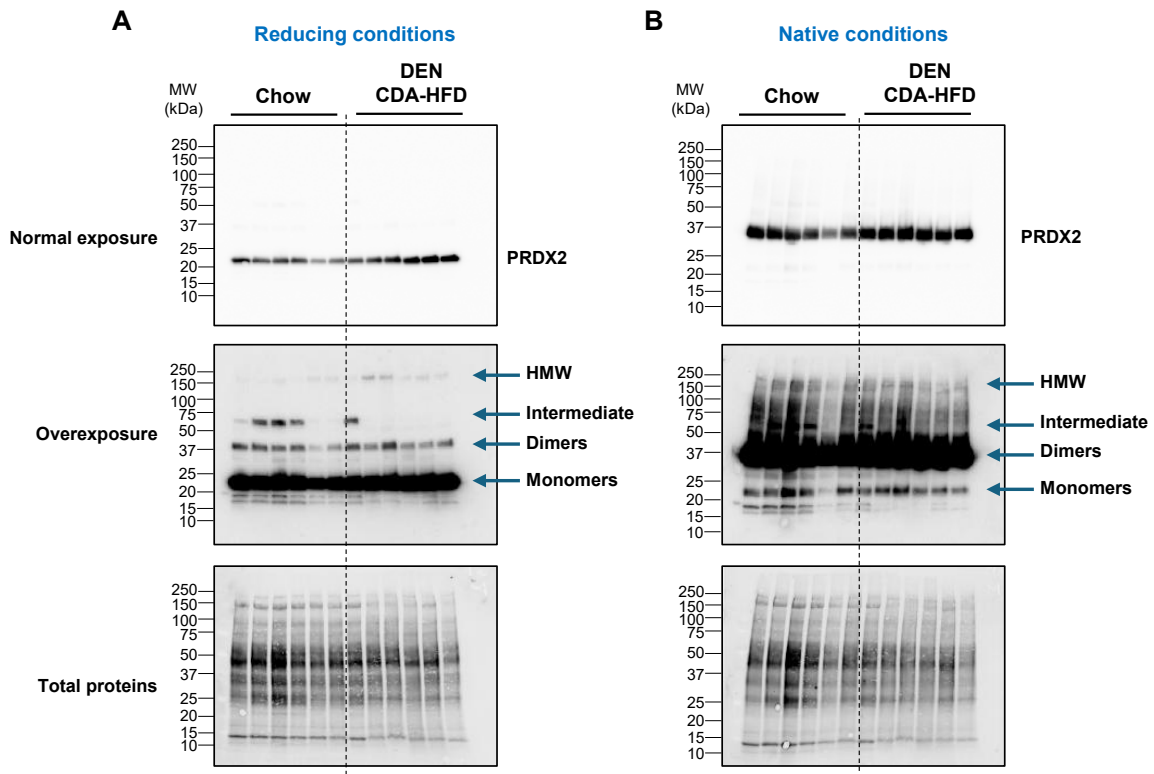

2

3 **Supplementary Figure 11 (related to Figure 3): PRDX2 expression and conformation in**  
4 **mouse livers.** PRDX2 expression and conformation were analyzed in mouse livers (Chow diet  
5 and DEN/CDA-HFD, 6 animals per group) by Western blot analysis (A) in reducing conditions  
6 and (B) non-denaturing polyacrylamide gel electrophoresis (native conditions). Arrows show  
7 the different PRDX2 conformation: monomers, dimers, intermediate forms and high molecular  
8 weight forms (HMW). The full-length Western blots are shown in this figure.

9

10

11

12

13

14

15

1 **Supplementary Figure 12**

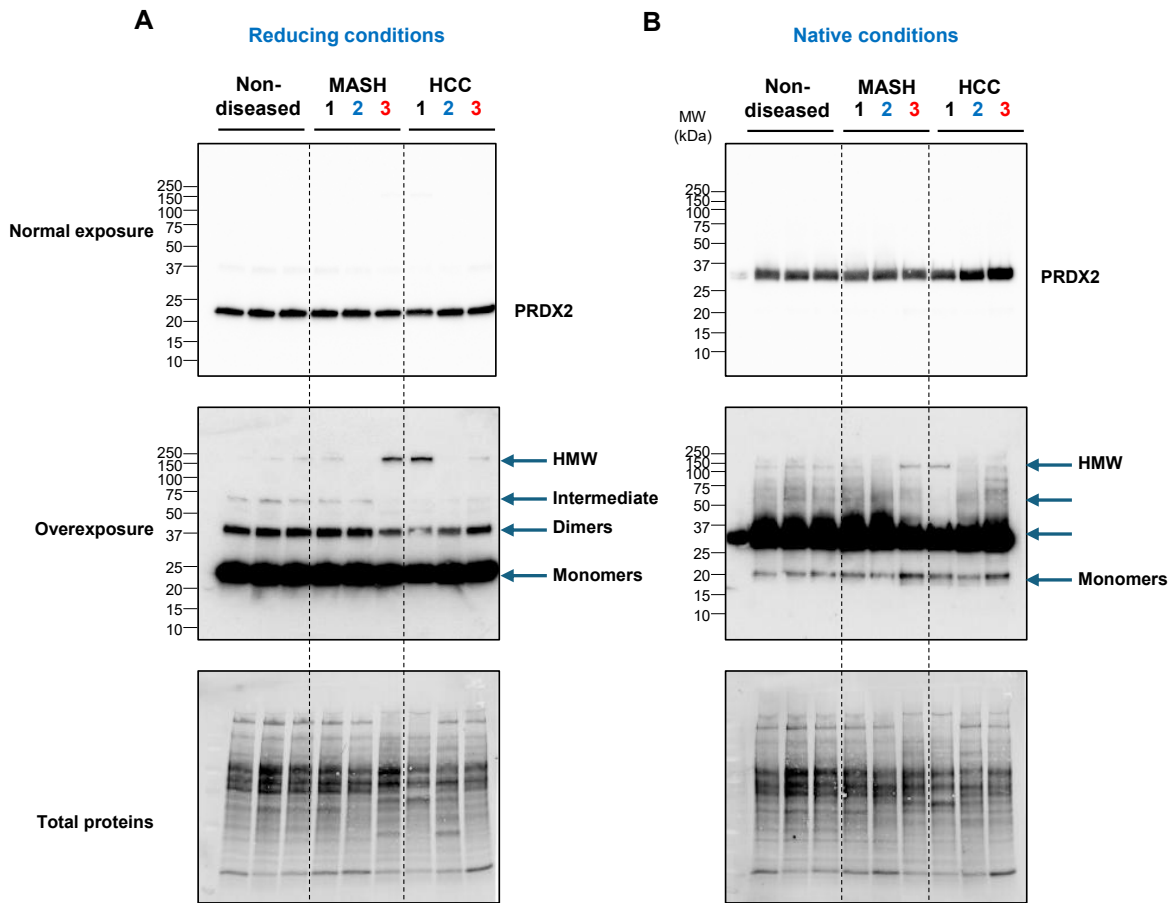

2

3

4 **Supplementary Figure 12 (related to Figure 3): PRDX2 expression and conformation in**  
 5 **human livers.** PRDX2 expression and conformation were analyzed in patient livers (non-  
 6 diseased, MASH and HCC as paired samples, 3 patients per group) by Western blot analysis  
 7 (A) in reducing conditions and (B) non-denaturing polyacrylamide gel electrophoresis (native  
 8 conditions). Arrows show the different PRDX2 conformation: monomers, dimers, intermediate  
 9 forms and high molecular weight forms (HMW). The full-length Western blots are shown in  
 10 this figure.

11

12

13

14

1 **Supplementary Figure 13**

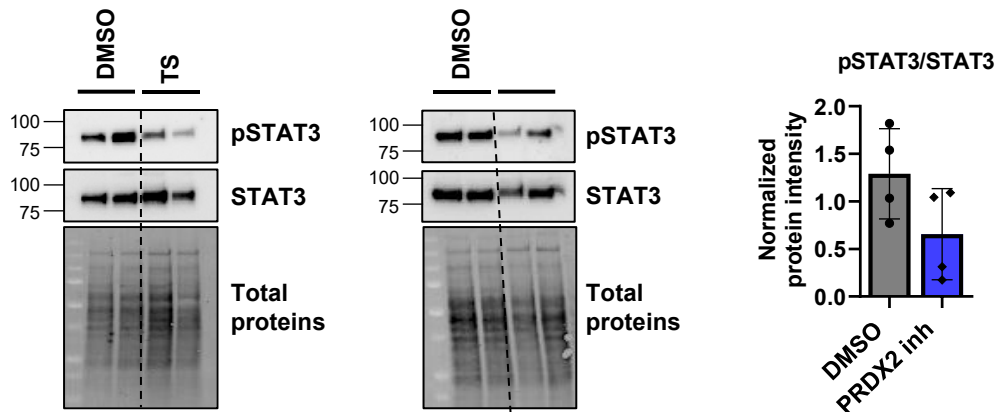

2

3 **Supplementary Figure 13 (related to Figure 4C). Inhibition of PRDX2 decreases STAT3**  
4 **activation in PHH.** PHH isolated from 2 different donors were treated with thioestrepton or  
5 DMSO (control). The effect on STAT3 activation was assessed by Western blot analysis. The  
6 graph shows means +/- sd of protein intensity normalized to total proteins and expressed as a  
7 ratio (pSTAT3/STAT3). n = 4, Mann-Whitney test ns.

8

9

10

11

12

13

14

15

16

17

18

19

20

21

22

1 **Supplementary Figure 14**

A

| Ctrl        |                                    |      |
|-------------|------------------------------------|------|
| Sequence*   | 5'-UGG UUU ACA UGU CGA CUA ATT -3' |      |
| 3' Overhang | sense (5'-3')                      | dTdT |
|             | antisense (5'-3')                  | dTdT |
| Prdx2       |                                    |      |
| Sequence*   | 5'-AAA UCA AGC UUU CGG ACU ATT -3' |      |
| 3' Overhang | sense (5'-3')                      | dTdT |
|             | antisense (5'-3')                  | dTdT |

B

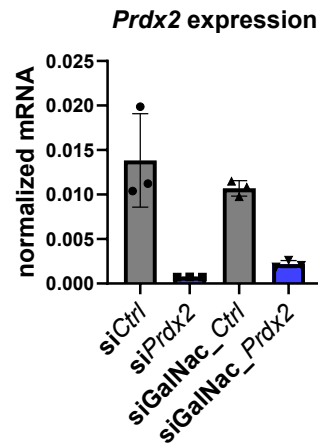

2

3 **Supplementary Figure 14 (related to Figure 5A): Validation of GalNac siRNA targeting**  
 4 ***Prdx2* efficacy.** A. Sequence and design of GalNac siRNAs targeting *Prdx2* expression and  
 5 non-targeting *Ctrl*. B. *Prdx2* expression was measured by qRT-PCR in Hep1.6 cells after  
 6 transfection with regular siRNAs or GalNac siRNAs . The graph shows means +/- sd of mRNAs  
 7 normalized to *Gapdh* of one representative experiment (out of 2) performed in triplicate (n =  
 8 3).

9

10

11

12

13

14

15

16

17

18

19

20

21

1 **Supplementary Figure 15**

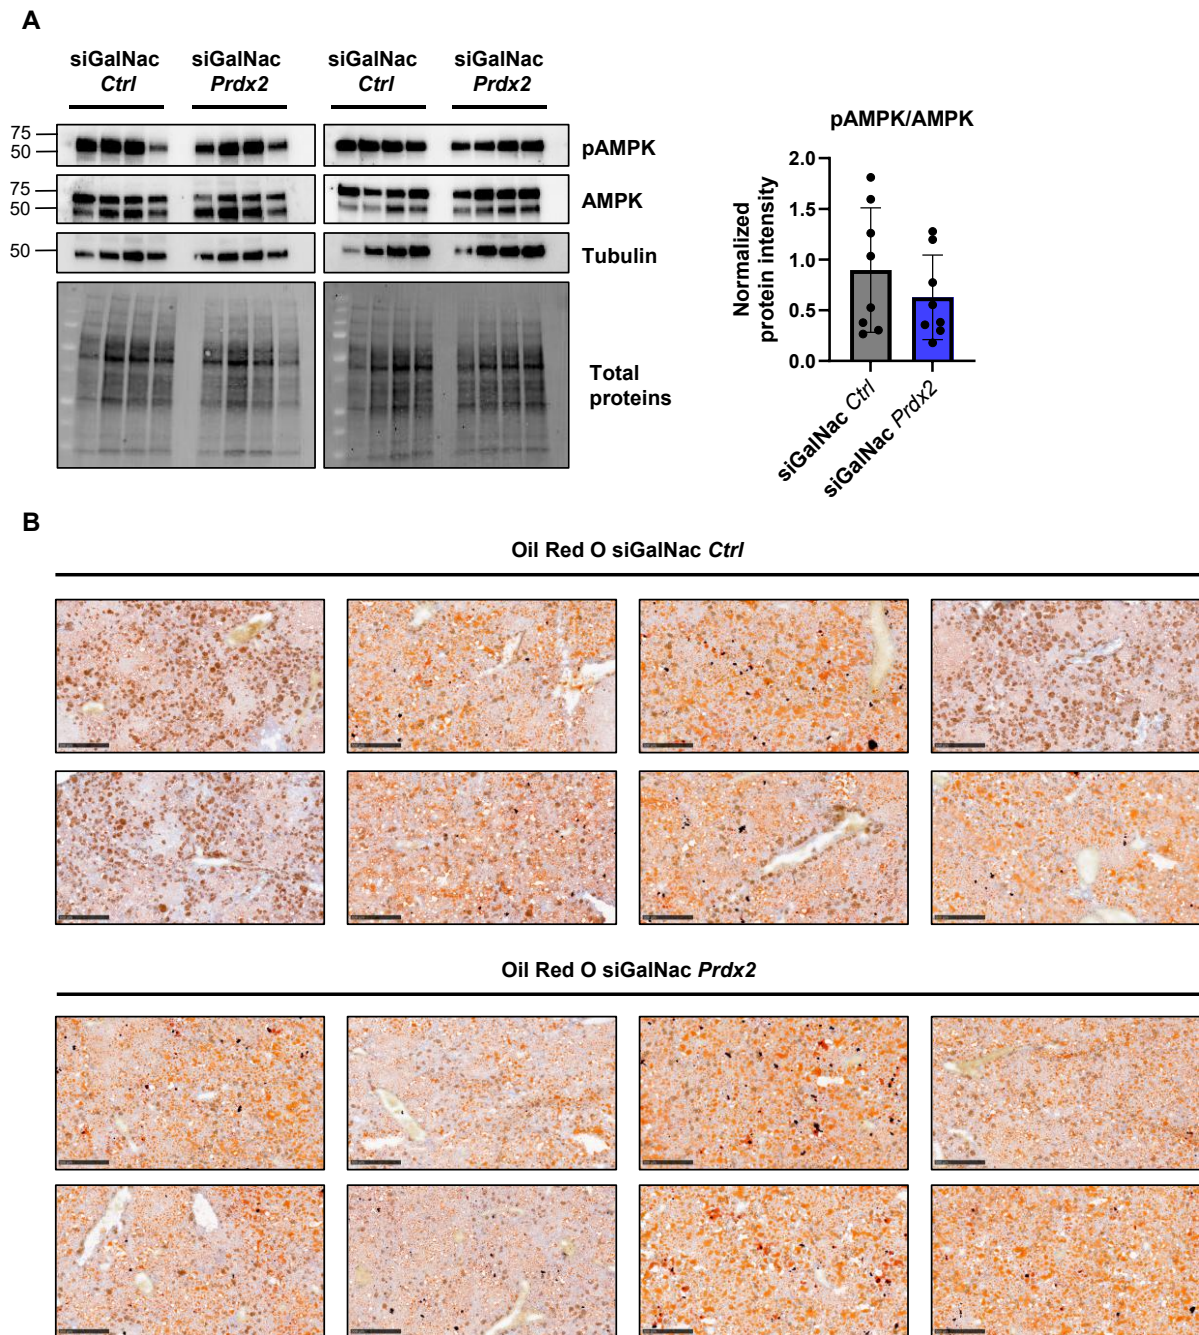

2

3

4 **Supplementary Figure 15 (related to Figure 5B-C): AMPK expression, activation and**  
 5 **lipid accumulation in mouse livers treated with GalNac siRNAs. A.** AMPK expression and  
 6 activation was assessed in liver tissues by Western blot analysis (8 animals per group). The  
 7 graph shows means +/- sd of protein intensity normalized to total proteins (stain free  
 8 technology). **B.** Representative images of Oil Red O stainings performed on animal livers. One  
 9 picture corresponds to one animal. Scale bar = 500  $\mu$ m.

1 **Supplementary Figure 16**

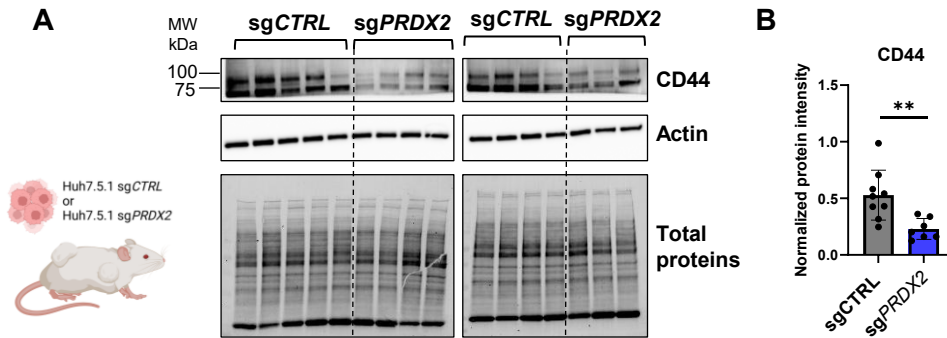

2

3

4 **Supplementary Figure 16 (related to Figure 6E): *PRDX2* KO decreases CD44 expression**

5 **in a CDX mouse model. A.** CD44 expression was assessed in tumors by Western blot analysis

6 (sgCTRL, n = 9; sgPRDX2, n = 7). **B.** The graph shows means +/- sd of protein intensity

7 normalized to total proteins (stain free technology). \*\* p < 0.001 (Mann-Whitney test).

8

9

10

11

12

13

14

15

16

17

18

19

20

21

22

23

24

1 **Supplementary Figure 17**

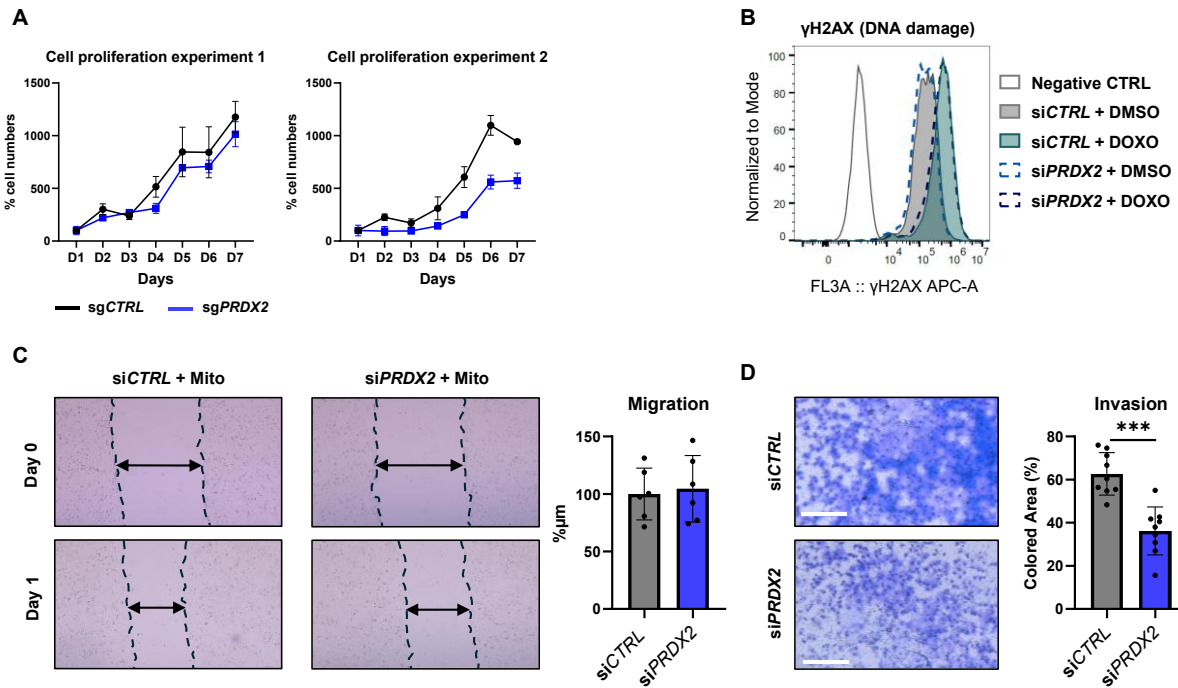

2

3 **Supplementary Figure 17 (related to Figure 8A-B): Role of PRDX2 in cancer development**

4 **and progression. A. PRDX2 KO decreases Huh7 cancer cell growth.** The graphs show means

5 +/- sd of cell numbers (in percentage to input) over a time course of 7 days. Two representative

6 experiments performed in triplicate (out of 4) are shown. **B. PRDX2 KD has no impact on DNA**

7 **damage in Huh7 cells.** DNA damages were measured using the histone H2AX phosphorylated

8 (γH2AX) marked detected by flow cytometry after stimulation of Huh7 cells with doxorubicin

9 (DOXO) to induce oxidative stress and cell senescence, or DMSO control. One representative

10 histogram out of 3 is shown. **C. PRDX2 KD has no impact on Huh7 cancer cell migration.** Cell

11 migration was assessed by a wound healing assay in presence of mitomycin (mito) to block cell

12 proliferation. Representative pictures are shown. The graphs show means +/- sd of cell

13 migration from three independent experiments performed in duplicate (n = 6). **D. PRDX2 KD**

14 **decreases Huh7 cancer cell invasion.** Cell invasion was assessed by a transwell assay.

15 Representative pictures are shown. The graphs show means +/- sd of cell invasion from three

16 independent experiments performed in triplicate (n = 9). \*\*\* p < 0.0001 (Mann-Whitney test).

17

18

19

1 **Supplementary Figure 18**

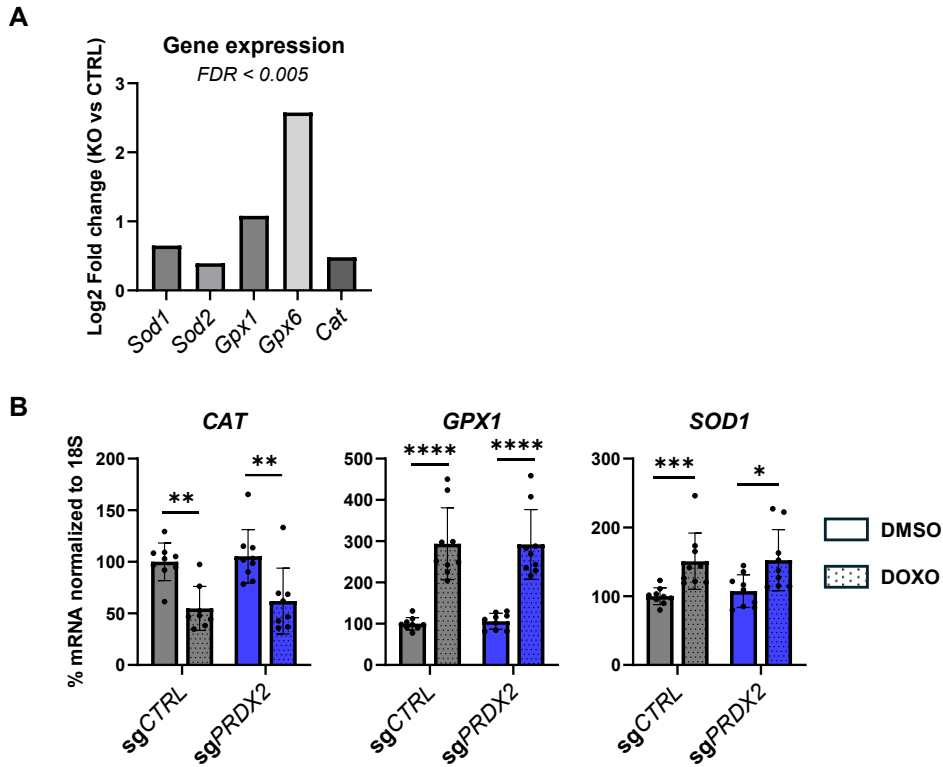

2

3

4 **Supplementary Figure 18 (related to Figures 8E-F): Expression of the main antioxidant**  
 5 **defense systems in mouse livers and in *PRDX2* KO cancer cells. A.** *Prdx2* KO in hepatocytes  
 6 increases expression of other antioxidant enzymes, catalase (*Cat*), glutathione peroxidase (*Gpx*)  
 7 and super oxide dismutase (*Sod*) (RNA-Seq data, expressed in log2 fold change). False  
 8 discovery rates (FDR) < 0.005. **B.** *PRDX2* KO in cancer cells does not impact expression of  
 9 antioxidant enzymes, even under oxidative stress induced by doxorubicin (DOXO). Gene  
 10 expression was measured by qRT-PCRs in *PRDX2* KO and *CTRL* Huh7.5.1 cells. The graph  
 11 shows means +/- sd of mRNAs normalized to *18S* of three independent experiments performed  
 12 in triplicate (n =9).

13

14

15

16

1 **SUPPLEMENTARY TABLES:**

2  
3 **Supplementary Table 1 (related to supplementary Figure 1): Clinical information of the**  
4 **HCC cases.** The column “PRDX2” indicate the level of expression of PRDX2 in the tumor  
5 tissue compared to adjacent non tumoral tissue.

| Case ID     | Number      | Stage | Phenotype                 | Disease                         | PRDX2 |
|-------------|-------------|-------|---------------------------|---------------------------------|-------|
| HCC case 1  | 557 tumor 1 | pT2   | Well differentiated       | No fibrosis, steatosis          | +     |
| HCC case 2  | 557 tumor 2 | pT2   | Well differentiated       | No fibrosis, steatosis          | +     |
| HCC case 3  | 544         | pT1b  | Well differentiated       | Cirrhosis, steatosis            | -     |
| HCC case 4  | 559         | pT1   | Moderately to well        | Cirrhosis, steatosis            | -     |
| HCC case 5  | 576         | pT1   | Well differentiated       | Fibrosis, steatosis             | +     |
| HCC case 6  | 577         | pT3   | Well differentiated       | Cirrhosis, steatosis            | =     |
| HCC case 7  | 558         | pT1b  | Well differentiated       | Fibrosis, steatosis             | +     |
| HCC case 8  | 608         | pT1b  | Moderately differentiated | Cirrhosis                       | +     |
| HCC case 9  | 615         | pT3   | Moderately differentiated | No fibrosis                     | +     |
| HCC case 10 | 551         | pT4   | Well differentiated       | Vascular invasion, micronodules | NA    |

- 1 **Supplementary Table 2 (related to Figure 1H): The 32 gene PLS.** List of poor-and good-  
 2 prognosis associated genes and of housekeeping genes used for normalization (8).

| <b>Poor-prognosis genes</b> |                    |                                                                     |
|-----------------------------|--------------------|---------------------------------------------------------------------|
| <b>Gene ID</b>              | <b>Gene Symbol</b> | <b>Description</b>                                                  |
| 3983                        | ABLIM1             | Actin binding LIM protein 1                                         |
| 1293                        | COL6A3             | Collagen, type VI, alpha 3                                          |
| 9170                        | EDG4               | Endothelial differentiation lysophosphatidic acid G-protein-coupled |
| 1950                        | EGF                | Epidermal growth factor (beta-urogast)                              |
| 2043                        | EPHA4              | EPH receptor A4                                                     |
| 2326                        | FMO1               | Flavin containing monooxygenase 1                                   |
| 2488                        | FSHB               | Follicle stimulating hormone beta polypeptide                       |
| 2877                        | GPX2               | Glutathione peroxidase 2 (gastrointestinal)                         |
| 3680                        | ITGA9              | Integrin , alpha 9                                                  |
| 4316                        | MMP7               | Matrix metalloproteinase 7 (matrilysin, uterine)                    |
| 23397                       | NCAPH              | Non-SMC condensin I complex, subunit H                              |
| 4843                        | NOS2A              | Nitric oxide synthase 2A (inducible, hepatocytes)                   |
| 4922                        | NTS                | Neurotensin                                                         |
| 5593                        | PRKG2              | Protein kinase, cGMP-dependent type II                              |
| 23029                       | RBM34              | RNA binding motif protein 34                                        |
| 5055                        | SERPINB2           | Serpin peptidase inhibitor, clade B (ovalbumin), member 2           |
| 6456                        | SH3GL2             | SH3-domain GFB2-like 2                                              |
| 6672                        | SP100              | SP100 nuclear antigen                                               |
| 7204                        | TRIO               | Triple functional domain (PTPRF interacting)                        |
| <b>Good-prognosis genes</b> |                    |                                                                     |
| 6296                        | ACSM3              | Acyl-CoA synthetase medium-chain family member 3                    |
| 151                         | ADRA2B             | Adrenergic, alpha-2B- receptor                                      |
| 223                         | ALDH9A1            | Aldehyde dehydrogenase 9 family, member A1                          |
| 3612                        | IMPA1              | Inositol(myo)-1(or 4)-monophosphatase 1                             |
| 5207                        | PFKFB1             | 6-phosphofructo-2-kinase/fructose-2,6-biphosphatase 1               |
| 5313                        | PKLR               | Pyruvate kinase, liver and RBC                                      |
| 5502                        | PPP1R1A            | Protein phosphatase 1, regulatory (inhibitor) subunit 1A            |
| 5691                        | PSMB3              | Proteasome (prosome, macropain) subunit, beta type, 3               |
| 5771                        | PTPN2              | Protein tyrosine phosphatase, non-receptor type 2                   |
| 6018                        | RLF                | Rearranged L-myc fusion                                             |
| 9252                        | RPS6KA5            | Ribosomal protein S6 kinase, 90 kDa, polypeptide 5                  |
| 27346                       | TMEM97             | Transmembrane protein 97                                            |
| 7276                        | TTR                | Transthyretin (prealbumin, amyloidosis type I)                      |
| <b>Housekeeping genes</b>   |                    |                                                                     |
| 506                         | ATP5B              | ATP synthase F1 subunit beta                                        |
| 7917                        | BAT3               | BAG cochaperone 6                                                   |
| 1351                        | COX8A              | Cytochrome c oxidase subunit 8A                                     |
| 3094                        | HINT1              | Histidine triad nucleotide binding protein 1                        |
| 3181                        | HNRNPA2B1          | Heterogeneous nuclear ribonucleoprotein A2/B1                       |
| 4695                        | NDUFA2             | NADH:ubiquinone oxidoreductase subunit A2                           |

3

4

1 **Supplementary Table 3 (related to Figure 3): Gene set enrichment analysis (GSEA) of**  
2 **RNA-Seq from mouse liver tissues (MASH/HCC mouse model).** Refer to the excel table  
3 “GSEA analysis of RNA-Seq from mouse liver tissues”. The pathways are ranked according to  
4 the normalized enrichment score (NES) (*sgPrdx2* vs *sgCtrl*). FDR < 0.05 are considered as  
5 significant enriched pathways(10). RNA-Seq data were deposited in the NCBI Gene Expression  
6 Omnibus database with the accession number: GSE199320.

7

8 **Supplementary Table 4: Reagents and resources**

| Oligonucleotides used for gene expression assay |                               |                               |                            |
|-------------------------------------------------|-------------------------------|-------------------------------|----------------------------|
| Species                                         | Gene                          | 5'-3' Sequence                |                            |
|                                                 |                               | Forward                       | Reverse                    |
| Mouse                                           | <i>Abca1</i>                  | 5'-AACAGTTTGTGGCCCTTTTG-3'    | 5'-AGTTCAGGCTGGGGTACTT-3'  |
|                                                 | <i>Gapdh</i>                  | 5'-TTCACCACCATGGAGAAGGC-3'    | 5'-TAAGCAGTTGGTGGTGCAGG-3' |
|                                                 | <i>Prdx2</i>                  | 5'-GGGCCACGCATAAAAGGTTC-3'    | 5'-CCATGACTGCGTGAGCAAGA-3' |
|                                                 | <i>Abcg5</i>                  | Mm00446241_m1 (ThermoFischer) |                            |
|                                                 | <i>Abcg8</i>                  | Mm00445980_m1 (ThermoFischer) |                            |
|                                                 | <i>Acat2</i>                  | Mm00782408_s1 (ThermoFischer) |                            |
|                                                 | <i>Colla1</i>                 | Mm00801666_g1 (ThermoFischer) |                            |
|                                                 | <i>Gapdh</i>                  | 4351309 (Applied Biosystems)  |                            |
|                                                 | <i>Scarb1</i>                 | Mm00450234_m1 (ThermoFischer) |                            |
|                                                 | <i>Tgfb1</i>                  | Mm01178820_m1 (ThermoFischer) |                            |
|                                                 | <i>Timp1</i>                  | Mm01341361_m1 (ThermoFischer) |                            |
|                                                 | <i>Prdx1</i>                  | Mm01621996_s1 (ThermoFischer) |                            |
|                                                 | <i>Prdx3</i>                  | Mm00545848_m1 (ThermoFischer) |                            |
|                                                 | <i>Prdx4</i>                  | Mm00450261_m1 (ThermoFischer) |                            |
|                                                 | <i>Prdx5</i>                  | Mm00465365_m1 (ThermoFischer) |                            |
| <i>Prdx6</i>                                    | Mm07306454_mH (ThermoFischer) |                               |                            |
|                                                 | <i>Txn1</i>                   | Mm00726847_s1 (ThermoFischer) |                            |

|                                                   |                                 |                                 |                 |
|---------------------------------------------------|---------------------------------|---------------------------------|-----------------|
| <b>Human</b>                                      | <i>CAT</i>                      | Hs00156308_m1 (ThermoFischer)   |                 |
|                                                   | <i>GPXI</i>                     | Hs00829989_gH (ThermoFischer)   |                 |
|                                                   | <i>PRDX2</i>                    | Hs00853603_s1 (ThermoFischer)   |                 |
|                                                   | <i>SOD1</i>                     | Hs00533490_m1 (ThermoFischer)   |                 |
|                                                   | <i>GAPDH</i>                    | 10555385 (Applied Biosystems)   |                 |
|                                                   | <i>18S</i>                      | 4319413E (Applied Biosystems)   |                 |
| <b>Oligonucleotides for mouse <i>Prdx2</i> KO</b> |                                 |                                 |                 |
| <b>Target</b>                                     | <b>5'-3' Sequence</b>           |                                 |                 |
| CTRL                                              | 5'-CACCGGTGAACCGCATCGAGCTGA-3'  | 5'-AAACTCAGCTCGATGCGGTTACCC-3'  |                 |
| <i>Prdx2-1</i>                                    | 5'-CACCGTCCGATTTGCGCGTTGCCGG-3' | 5'-AAACCCGGCAACGCGCAAATCGGAC-3' |                 |
| <i>Prdx2-2</i>                                    | 5'-CACCGGCCTCCGGCAACGCGCAAAT-3' | 5'-AAACATTTGCGCGTTGCCGGAGGCC-3' |                 |
| <i>Prdx2-3</i>                                    | 5'-CACCGCAACGCGCAAATCGGAAAGT-3' | 5'-AAACACTTTCGGATTTGCGCGTTGC-3' |                 |
| <b>sgRNA sequence for <i>PRDX2</i> KO</b>         |                                 |                                 |                 |
| <b>Target</b>                                     | <b>5'-3' Sequence</b>           |                                 |                 |
| CTRL                                              | 5'-GGTGAACCGCATCGAGCTGA-3'      |                                 |                 |
| <i>PRDX2-1</i>                                    | 5'-GTGAAGCTGTCCGACTACAA-3'      |                                 |                 |
| <i>PRDX2-2</i>                                    | 5'-GGCGCCATCAACCACCGCTG-3'      |                                 |                 |
| <b>siRNA used for KD experiment</b>               |                                 |                                 |                 |
| <b>Name</b>                                       | <b>Source</b>                   | <b>Reference</b>                |                 |
| ON-TARGETplus Non-targeting Control Pool          | Dharmacon                       | D-001810-10-20                  |                 |
| ON-TARGETplus Human PRDX2 siRNA – SMART POOL      | Dharmacon                       | L-008178-01-0005                |                 |
| ON-TARGETplus Mouse Prdx2 siRNA SMART POOL        | Dharmacon                       | L-060550-02-0020                |                 |
| <b>GalNac siRNAs</b>                              |                                 |                                 |                 |
| <b>Name</b>                                       | <b>Source</b>                   | <b>Reference</b>                |                 |
| Ctrl 5'-UGG UUU ACA UGU CGA CUA ATT-3'            | MicroSynth                      | Custom                          |                 |
| Prdx2 5'AAA UCA AGC UUU CGG ACU ATT-3'            | MicroSynth                      | Custom                          |                 |
| <b>Antibody used for immunohistochemistry</b>     |                                 |                                 |                 |
| <b>Target</b>                                     | <b>Host</b>                     | <b>Reference</b>                | <b>Dilution</b> |
| PRDX2                                             | Rabbit                          | 10545-2-AP ProteinTech          | 1:400           |

|                                                                  |                          |                                    |                  |
|------------------------------------------------------------------|--------------------------|------------------------------------|------------------|
| MCM-2                                                            | Rabbit                   | Ab240933 Abcam                     | 1:500            |
| <b>Antibody used for immunoblotting</b>                          |                          |                                    |                  |
| <b>Target/clone</b>                                              | <b>Host</b>              | <b>Reference</b>                   | <b>Dilution</b>  |
| Akt (pan) (C67E7)                                                | Rabbit                   | 4691 Cell Signaling                | 1:1000           |
| AMPK $\alpha$ (polyclonal)                                       | Rabbit                   | 2532 Cell signaling                | 1:1000           |
| CRISPR/Cas9 (4G10)                                               | Mouse                    | C15200216-100 Diagenode            | 1 :5000          |
| Caspase 3 (polyclonal)                                           | Rabbit                   | 9662 Cell Signaling                | 1:1000           |
| Cleaved caspase 3 (Asp175)                                       | Rabbit                   | 9661 Cell Signaling                | 1:1000           |
| Erk (1/2) (216703)                                               | Mouse                    | MAB1576 R&D systems                | 1:1000           |
| STAT3 (79D7)                                                     | Rabbit                   | 4904 Cell Signaling                | 1:2000           |
| Phospho Akt (Ser473) (193H12)                                    | Rabbit                   | 4058 Cell Signaling                | 1:1000           |
| Phospho AMPK $\alpha$ (Thr172) (40H9)                            | Rabbit                   | 2535 Cell Signaling                | 1:1000           |
| Phospho Erk1(Thr202/Tyr204)<br>/Erk2(Thr185/Tyr187) (polyclonal) | Rabbit                   | AF1018 R&D systems                 | 1:2000           |
| Phospho STAT3 (Tyr705) (D3A7)                                    | Rabbit                   | 9145 Cell Signaling                | 1:2000           |
| PRDX2 (EPR5154)                                                  | Rabbit                   | Abcam ab109367                     | 1:1000           |
| GRP78/BIP (polyclonal)                                           | Rabbit                   | Abcam ab21685                      | 1:1000           |
| $\beta$ -actin (AC-15)                                           | Mouse                    | A5441 Sigma-Aldrich                | 1:2000           |
| $\beta$ -tubulin (polyclonal)                                    | Rabbit                   | GTX101279 GeneTex                  | 1:1000           |
| rabbit IgG conjugated to HRP                                     | Goat                     | 111-035-144 Jackson-immunoresearch | 1:10 000         |
| mouse IgG conjugated to HRP                                      | Sheep                    | NA931 GE Healthcare                | 1:5000           |
| <b>Chemicals, Peptides, and Recombinant Proteins</b>             |                          |                                    |                  |
| <b>Name</b>                                                      | <b>Source</b>            |                                    | <b>Reference</b> |
| Cultrex Basement Membrane Extract                                | R&D systems              |                                    | Cat# 3432-005-01 |
| DMSO                                                             | Sigma-Aldrich            |                                    | Cat#41640        |
| H <sub>2</sub> O <sub>2</sub>                                    | Merck                    |                                    | Cat#1.07209.0250 |
| Clarity WB ECL reagent                                           | Biorad                   |                                    | Cat#170-5061     |
| TRIzol                                                           | ThermoFischer Scientific |                                    | Cat#15596026     |
| Lipofectamine RNAi Max                                           | Invitrogen               |                                    | Cat#13778-150    |

|                                                |               |                  |
|------------------------------------------------|---------------|------------------|
| Protease inhibitor EDTA free                   | Roche         | Cat#11873580001  |
| Phosphatase inhibitor cocktail 2               | Sigma-Aldrich | Cat#P5726        |
| Phosphatase inhibitor cocktail 3               | Sigma-Aldrich | Cat#P0044        |
| Hematoxyline                                   | Bio Optica    | Cat#05-M06004    |
| Eosin                                          | Sigma         | Cat#HT110116     |
| PicroSirusRed Direct Red 80                    | Sigma-Aldrich | Cat#365548       |
| OilRed O                                       | Merck         | Cat#1.05230.0025 |
| DEN                                            | Sigma-Aldrich | Cat#N0756        |
| iScript™ RT-qPCR Sample Preparation Reagent    | Biorad        | Cat#170-5061     |
| Hoechst                                        | Invitrogen    | Cat#C10337G      |
| Crystal violet                                 | Sigma         | Cat# C0775       |
| <b>Critical Commercial Assays</b>              |               |                  |
| <b>Name</b>                                    | <b>Source</b> | <b>Reference</b> |
| Corning Costar Transwell cell culture inserts  | Corning       | Cat#CLS3464-48EA |
| CellEvent® Caspase-3/7 Green Detection Reagent | Invitrogen    | Cat#C10423       |
| TUNEL Assay kit HRP-DAB                        | Abcam         | Cat#ab206386     |
| Cell titer Glo                                 | Promega       |                  |
| OptiMEM                                        | Gibco         | Cat#31985-062    |
| Vectastain Mouse                               | Vector        | Cat#PK-6102      |
| Vectastain Rabbit                              | Vector        | Cat#PK-6101      |
| Click-iT EdU Flow Cytometry Assay Kit          | Invitrogen    | Cat#C10425       |
| Hydroxyproline Assay kit                       | Sigma Aldrich | Cat#MAK-0008     |
| FxCycle™ Far Red Stain                         | Invitrogen™   | Cat# F10348      |
| HCS LipidTOX™ Deep Red Neutral Lipid Stain     | Invitrogen™   | Cat# H34477      |
| DCFDA / H2DCFDA - Cellular ROS Assay Kit       | Abcam         | Cat# ab113851    |

1  
2

## 1 SUPPLEMENTARY REREFENCES:

- 2 1. Crouchet E, et al. A human liver cell-based system modeling a clinical prognostic liver  
3 signature for therapeutic discovery. *Nat Commun.* 2021;12(1):5525.
- 4 2. Pietschmann T, et al. Construction and characterization of infectious intragenotypic and  
5 intergenotypic hepatitis C virus chimeras. *Proc Natl Acad Sci U S A.* 2006;103(19):7408–7413.
- 6 3. Hoshida Y. Nearest Template Prediction: A Single-Sample-Based Flexible Class Prediction  
7 with Confidence Assessment. *PLOS ONE.* 2010;5(11):e15543.
- 8 4. Reich M, et al. GenePattern 2.0. *Nat Genet.* 2006;38(5):500–501.
- 9 5. Juehling F, et al. Targeting clinical epigenetic reprogramming for chemoprevention of  
10 metabolic and viral hepatocellular carcinoma. *Gut.* 2021;70(1):157–169.
- 11 6. Aizarani N, et al. A human liver cell atlas reveals heterogeneity and epithelial progenitors.  
12 *Nature.* 2019;572(7768):199–204.
- 13 7. Ramachandran P, et al. Resolving the fibrotic niche of human liver cirrhosis at single cell  
14 level. *Nature.* 2019;575(7783):512–518.
- 15 8. Nakagawa S, et al. Molecular Liver Cancer Prevention in Cirrhosis by Organ Transcriptome  
16 Analysis and Lysophosphatidic Acid Pathway Inhibition. *Cancer Cell.* 2016;30(6):879–890.
- 17 9. Shannon P, et al. Cytoscape: A Software Environment for Integrated Models of Biomolecular  
18 Interaction Networks. *Genome Res.* 2003;13(11):2498–2504.
- 19 10. Subramanian A, et al. Gene set enrichment analysis: a knowledge-based approach for  
20 interpreting genome-wide expression profiles. *Proc Natl Acad Sci U S A.* 2005;102(43):15545–  
21 15550.
